# Supplementary material
Source: PubMed Central journal article supplement (PMC3140411)
Supplement: grsb-5-2011-041-s001.pdf [file grsb-5-2011-041-s001.pdf]

| Category                | Symbol          | Description                                                                           | Fold-change | RefSeq    | Sequence                              |
|-------------------------|-----------------|---------------------------------------------------------------------------------------|-------------|-----------|---------------------------------------|
| 1.Energy Metabolism     | <b>B4galnt1</b> | <b>beta-1,4-n-acetyl-galactosaminyl transferase 1</b>                                 | <b>6.97</b> | NM_008080 | CCATAAAAGC                            |
| 1.Energy Metabolism     | <b>Apod</b>     | <b>Apolipoprotein d</b>                                                               | <b>3.66</b> | NM_007470 | CTATAAAAGG                            |
| 1.Energy Metabolism     | <b>Pfkp</b>     | <b>Phosphofructokinase, Platelet</b>                                                  | <b>2.1</b>  | NM_019703 | CCAAATTTAG                            |
| 1.Energy Metabolism     | <b>Acot9</b>    | <b>Acyl-CoA Thioesterase 9</b>                                                        | <b>2.01</b> | NM_019736 | GCTTCTTTGG<br>CCTTCTTTGA              |
| 1.Energy Metabolism     | <b>Slc27a1</b>  | <b>Solute Carrier Family 27 (fatty acid transporter), Member 1</b>                    | <b>0.49</b> | NM_011977 | GCATATATGG                            |
| 1.Energy Metabolism     | <b>Lipc</b>     | <b>Lipase, Hepatic</b>                                                                | <b>0.45</b> | NM_008280 | CCGTCTAAGG<br>GCTTACATGG              |
| 1.Energy Metabolism     | <b>Fdft1</b>    | <b>Farnesyl Diphosphate Farnesyl Transferase 1</b>                                    | <b>0.45</b> | NM_010191 | CCATTTCTGG<br>CCAAACTTGG              |
| 1.Energy Metabolism     | <b>Coasy</b>    | <b>Coenzyme A Synthase</b>                                                            | <b>0.37</b> | NM_027896 |                                       |
| 1.Energy Metabolism     | <b>Pafah1b3</b> | <b>Platelet-activating Factor Acetylhydrolase, isoform 1b, alpha1 subunit</b>         | <b>0.31</b> | NM_008776 | CCATTTAGGG                            |
| 1.Energy Metabolism     | <b>Aadac</b>    | <b>Arylacetamide Deacetylase (esterase)</b>                                           | <b>0.22</b> | NM_023383 | CCAGTTATGG<br>CTAATTAGG               |
| 1.Energy Metabolism     | <b>Elovl2</b>   | <b>Elongation of Very Long chain fatty acids (fen1/elo2, sur4/elo3, yeast)-like 2</b> | <b>0.2</b>  | NM_019423 | CCTTATAAGG                            |
| 1.Energy Metabolism     | <b>Akr1c6</b>   | <b>Hydroxysteroid (17-beta) Dehydrogenase 5</b>                                       | <b>0.14</b> | NM_030611 | CCATAAAAGG                            |
| 1.Energy Metabolism     | <b>Pgk2</b>     | <b>Phosphoglycerate Kinase 2</b>                                                      | <b>0.1</b>  | NM_031190 | CCATAGATGG                            |
| 1.Energy Metabolism     | <b>Es1</b>      | <b>Esterase 1</b>                                                                     | <b>0.06</b> | NM_007954 | CCATTTATTG<br>CCTTATTAG               |
| 1.Energy Metabolism     | <b>Apoa1</b>    | <b>apolipoprotein a-i</b>                                                             | <b>0.02</b> | NM_009692 | CCAGAAAAGG                            |
| 2.Xenobiotic Metabolism | <b>Maoa</b>     | <b>Monoamine Oxidase A</b>                                                            | <b>2.8</b>  | NM_173740 | CCATATAAGT                            |
| 2.Xenobiotic Metabolism | <b>Cyp2b10</b>  | <b>Cytochrome p450, family 2, subfamily b, polypeptide 10</b>                         | <b>2.17</b> | NM_009999 | CCTTTTATAG<br>CCAAGAAGG<br>CCAAATTTGG |

|                         |         |                                                                                        |       |           |                                       |
|-------------------------|---------|----------------------------------------------------------------------------------------|-------|-----------|---------------------------------------|
| 2.Xenobiotic Metabolism | Sult1a1 | Sulfotransferase family 1a, phenol-preferring, member 1                                | 0.45  | NM_133670 | CCCAATTAGT                            |
| 2.Xenobiotic Metabolism | Cyp3a16 | Cytochrome p450, family 3, subfamily a, polypeptide 16                                 | 0.14  | NM_007820 | CCATTTATGT<br>CCTTGTTTGG<br>CCAAATTTG |
| 2.Xenobiotic Metabolism | Ugt2b5  | UDP Glucuronosyltransferase 2 family, polypeptide b5                                   | 0.05  | NM_009467 | CCAAATTTGG<br>CCATAGATGG              |
| 2.Xenobiotic Metabolism | Cyp3a11 | Cytochrome p450, family 3, subfamily a, polypeptide 11                                 | 0.02  | NM_007818 | CCAGATATGG                            |
| 2.Xenobiotic Metabolism | Oat     | ornithine aminotransferase                                                             | 0.48  | NM_016978 | CCTTTTAGGG<br>CCTGATATGG              |
| 2.Xenobiotic Metabolism | Bphl    | biphenyl hydrolase-like (serine hydrolase, breast epithelial mucin-associated antigen) | 0.35  | NM_026512 | CAATAAATGG<br>CCATGTAAGG              |
| 2.Xenobiotic Metabolism | Skb1    | protein arginine n-methyltransferase 5                                                 | 0.31  | NM_013768 | CCTTATATAG<br>CCTTATATAG              |
| 2.Xenobiotic Metabolism | Uox     | urate oxidase                                                                          | 0.07  | NM_009474 | CCAAATATGG                            |
| 2.Xenobiotic Metabolism | Gnmt    | glycine n-methyltransferase                                                            | 0.06  | NM_010321 | CCAAAGTAGG<br>CCAAAGTAGG              |
| 3.Cytoskeleton          | Myl1    | Myosin, Light polypeptide 1                                                            | 4.65  | NM_021285 | CCCTAAATGG<br>CCATTTATAG              |
| 3.Cytoskeleton          | Anxa10  | annexin a10                                                                            | 31.21 | NM_011922 | CCATAATTGG                            |
| 3.Cytoskeleton          | Rab8b   | Rab8b, member ras oncogene family                                                      | 4.2   | NM_173413 | CCTAATTAGG                            |
| 3.Cytoskeleton          | Acta2   | Actin, alpha 2, smooth muscle, aorta                                                   | 3.65  | NM_007392 | CCCTATATGG<br>CCTTGTTTGG              |
| 3.Cytoskeleton          | Casq1   | Calsequestrin 1                                                                        | 2.81  | NM_009813 | CCATAGAAGG<br>CTATATAAGG              |
| 3.Cytoskeleton          | Actn1   | Actinin, alpha 1                                                                       | 2.56  | NM_134156 | CCATAAAATG<br>CCTTTTATGT              |
| 3.Cytoskeleton          | Myh7    | Myosin, Heavy polypeptide 7, cardiac muscle, beta                                      | 2.49  | NM_080728 | CCTTATTTGG<br>CCTTATTTGG              |
| 3.Cytoskeleton          | Epb4.2  | Erythrocyte protein band 4.2                                                           | 2.49  | NM_013513 | CCTTTTATGT<br>CCTTATTTGG              |
| 3.Cytoskeleton          | Dstn    | Destrin                                                                                | 2.27  | NM_019771 | >Dstn_4 ( ) CCTTTTATG                 |

|                 |               |                                                            |             |              |                                                   |
|-----------------|---------------|------------------------------------------------------------|-------------|--------------|---------------------------------------------------|
| 3.Cytoskeleton  | <b>Tpm2</b>   | <b>Tropomyosin 2, beta</b>                                 | <b>2.08</b> | NM_009416    | >Tpm2_5 ( ) CCTAATTAGT<br>>Tpm2_6 ( ) CCAAAAAGG   |
| 3.Cytoskeleton  | <b>Fmn1</b>   | <b>Formin-like 1</b>                                       | <b>0.47</b> | NM_001077698 | >Fmn1_1 ( ) CCAGATTGG<br>( ) CTTTTATGG            |
| 3.Cytoskeleton  | <b>Vps13c</b> | <b>Vacuolar Protein Sorting 13c (yeast)</b>                | <b>0.26</b> | NM_177184    | >Vps13c_2 ( ) CCAGAAATGG                          |
| 3.Cytoskeleton  | <b>Syt3</b>   | <b>Synaptotagmin iii</b>                                   | <b>0.15</b> | NM_016663    | >Syt3_4 ( ) CCAAATAGGG                            |
| 3.Cytoskeleton  | <b>Myh4</b>   | <b>Myosin, Heavy polypeptide 4, skeletal muscle</b>        | <b>0.05</b> | NM_010855    | >Myh4_6 ( ) CCAAAAATGG                            |
| 3.Cytoskeleton  | <b>Tspan8</b> | <b>Tetraspanin 8</b>                                       | <b>0.28</b> | NM_146010    | GCATAAAAGG ( )                                    |
| 3.Cytoskeleton  | <b>Hrc</b>    | <b>Hrc histidine rich calcium binding protein</b>          | <b>0.36</b> | NM_010473.   |                                                   |
| 3.Cytoskeleton  | <b>Dsc2</b>   | <b>Desmocollin 2</b>                                       | <b>0.41</b> | NM_010478    | >Dsc2_5 ( ) ACATTTATGG<br>>Dsc2_6 ( ) CCTTTTTTGG  |
| 4.Transcription | <b>Fhl1</b>   | <b>four and a half lim domains 1</b>                       | <b>3.03</b> | NM_001077361 | ( ) CCAAAGAAGG<br>( ) CCTAATATGG                  |
| 4.Transcription | <b>Rps4y2</b> | <b>Ribosomal protein S4, Y-linked 2</b>                    | <b>2.38</b> | NR_003634    | >Rps4y2_3 (-6640) CTAATTTGG<br>(-6758) GCATTTATGG |
| 4.Transcription | <b>Plagl1</b> | <b>pleiomorphic adenoma gene-like 1</b>                    | <b>6.87</b> | NM_009538    | >Plagl1_1 ( ) CCTAATTAGA                          |
| 4.Transcription | <b>Dlx5</b>   | <b>distal-less homeobox 5</b>                              | <b>4.85</b> | NM_010056    |                                                   |
| 4.Transcription | <b>Atf3</b>   | <b>activating transcription factor 3</b>                   | <b>4.53</b> | NM_007498    | >Atf3_3 ( ) GCAAATTTGG                            |
| 4.Transcription | <b>Pus1</b>   | <b>pseudouridine synthase 1 (tRNA-uridine isomerase I)</b> | <b>4.31</b> | NM_001025561 | >Pus1_3 ( ) CCATTTATTG<br>>Pus1_4 ( ) TCATAAAAGG  |
| 4.Transcription | <b>Tbp</b>    | <b>tata box binding protein</b>                            | <b>3.85</b> | NM_013684.   | >>TBP_3_780_CTTTTTATGG<br>>>TBP_5_948_CTTTTTGG    |
| 4.Transcription | <b>Birc1c</b> | <b>baculoviral iap repeat-containing 1c</b>                | <b>2.81</b> | U15647       |                                                   |
| 4.Transcription | <b>Id2</b>    | <b>Inhibitor of dna binding 2</b>                          | <b>2.33</b> | NM_010496    | >Id2_4 ( ) CCAAACCTTGG<br>( ) CCAAATTCGG          |
| 4.Transcription | <b>Chx10</b>  | <b>ceh-10 homeo domain containing homolog</b>              | <b>2.33</b> | NM_007701    | >Chx10_2 ( ) CCTAACATGG                           |
| 4.Transcription | <b>Icsbp1</b> | <b>interferon regulatory factor 8</b>                      | <b>2.1</b>  | NM_008320    | >Icsbp1_6 ( ) CCATTTTTGG                          |

|                 |         |                                                                                 |      |           |                                                             |
|-----------------|---------|---------------------------------------------------------------------------------|------|-----------|-------------------------------------------------------------|
| 4.Transcription | Six3    | sine oculis-related homeobox 3 homolog                                          | 0.49 | NM_011381 | >Six3_5 ( ) CCTTTTAGGG                                      |
| 4.Transcription | Eif2s3y | eukaryotic translation initiation factor 2, subunit 3, structural gene y-linked | 0.49 | NM_012011 | >Eif2s3y_1 ( ) CCATAGATGG<br>>Eif2s3y_4 ( ) CTTTTATGG       |
| 4.Transcription | Ddx3x   | dead/h (asp-glu-ala-asp/his) box polypeptide 3, x-linked                        | 0.47 | NM_010028 | >Ddx3x_4 ( ) CCAAAGTTGG<br>>Ddx3x_5 ( ) CCATATATGA          |
| 4.Transcription | Rps12   | ribosomal protein s12                                                           | 0.47 | NM_011295 | >Rps12_4 ( ) CCAAAGTAGG<br>>Rps12_6 ( ) CCATATAAGA          |
| 4.Transcription | Lhx8    | lim homeobox protein 8                                                          | 0.46 | NM_010713 | >Lhx8_4 ( ) GCATAAATGG                                      |
| 4.Transcription | Hmx1    | h6 homeo box 1                                                                  | 0.44 | NM_010445 |                                                             |
| 4.Transcription | Gtf3c4  | general transcription factor iiic, polypeptide 4                                | 0.36 | NM_172977 | >Gtf3c4_4 ( ) CTTCTTTGG<br>>Gtf3c4_6 ( ) CTATTTATGG         |
| 4.Transcription | Sp4     | trans-acting transcription factor 4                                             | 0.36 | NM_009239 | >Sp4_1 ( ) CAAAATTTGG<br>>Sp4_3 ( ) CCTTATATAG              |
| 4.Transcription | Brca1   | breast cancer 1                                                                 | 0.29 | NM_009764 | >Brca1_4 ( ) CCAAAAATGG<br>( ) CCAGAAATGG                   |
| 4.Transcription | Vax2    | ventral anterior homeobox containing gene 2                                     | 0.27 | NM_011912 | >Vax2_4 ( ) CCATAAATAG<br>>Vax2_5 ( ) CCAGAAAAGG            |
| 4.Transcription | Insm1   | Insulinoma-associated 1 (is a Zinc-finger factor)                               | 0.24 | NM_016889 | >Insm1_2 ( ) CCATTTATAG<br>( ) TCATAAATGG                   |
| 4.Transcription | Rps17   | ribosomal protein s17                                                           | 0.22 | NM_009092 | >Rps17_3 ( ) CCATCAATGG                                     |
| 4.Transcription | Hoxb8   | homeo box b8                                                                    | 0.2  | NM_010461 | >Hoxb8_5 ( ) CCAAATTTGG                                     |
| 4.Transcription | E2f3    | E2f transcription factor 3                                                      | 0.2  | NM_010093 | >E2f3_6 ( ) CCAGATAAGG<br>( ) CCATAAATGG                    |
| 4.Transcription | Ddb1    | damage specific dna binding protein 1                                           | 0.19 | NM_015735 | >Ddb1_5 ( ) CCAATCTGG<br>( ) CTTTCTTTGG                     |
| 4.Transcription | Rpl34   | Ribosomal Protein L34                                                           | 0.33 | NM_026724 | N>Rpl34_1 (-8935) CCCTTTTTGG<br>>Rpl34_4 (-4603) CTATAAAAGG |
| 4.Transcription | Tk1     | thymidine kinase 1                                                              | 0.2  | NM_009387 | >Tk1_3 ( ) TCATAAAAGG                                       |
| 4.Transcription | Rrm1    | ribonucleotide reductase m1                                                     | 0.13 | NM_009103 | >Rrm1_5 (-2369) CCAAAGATGG<br>(-1643) CCAAGTTTGG            |

|                        |          |                                                                              |      |              |                                                      |
|------------------------|----------|------------------------------------------------------------------------------|------|--------------|------------------------------------------------------|
| 4.Transcription        | Nsun2    | nol1/nop2/sun domain family 2                                                | 0.46 | NM_145354    | >Nsun2_4 (-3508) CCATTTATG                           |
| 5.Extracellular Matrix | Postn    | Periostin, Osteoblast specific factor                                        | 4.36 | NM_015784    | >>Postn_6_613 N 10 CCATAAATGG<br>507 R 10 CCAGATAAGG |
| 5.Extracellular Matrix | Ctgf     | Connective Tissue Growth Factor                                              | 4.34 | NM_010217    | >Ctgf_4 () CCTTATAGGG                                |
| 5.Extracellular Matrix | Ptpns1   | Protein Tyrosine Phosphatase, Non-receptor type Substrate 1                  | 2.52 | NM_007547    | >Ptpns1_3 () CCATCAATGG<br>() CCACAGAAGG             |
| 5.Extracellular Matrix | Bgn      | Biglycan                                                                     | 2.19 | NM_007542    | >Bgn_2 () CCTGCTTTGG<br>>Bgn_6 () CCATCTAAGG         |
| 5.Extracellular Matrix | Fbln1    | Fibulin 1                                                                    | 2.18 | NM_010180    | >Fbln1_1 () CCAGATAAGG<br>() CCAGATAAGG              |
| 5.Extracellular Matrix | Col1a1   | Procollagen, type i, alpha 1                                                 | 2.11 | NM_007742    | >Col1a1_6 () CCAAATTGGG                              |
| 5.Extracellular Matrix | Cldn11   | Claudin 11 (Oligodendrocyte transmembrane protein, Osp, Otm )                | 0.49 | NM_008770    | >Cldn11_5 () CCATAAAAAG                              |
| 5.Extracellular Matrix | Tecta    | Tectorin alpha                                                               | 0.45 | NM_009347    | >Tecta_1 () CCACAGAAGG<br>>Tecta_6 () CCTTCTTTTG     |
| 5.Extracellular Matrix | Cdh15    | Cadherin 15                                                                  | 0.22 | NM_007662    | >Cdh15_4 (-3773) CCCTATATGG                          |
| 5.Extracellular Matrix | Spock1   | Spock1/osteonectin                                                           | 0.22 | NM_009262.   | >AV350751_3 () CCTTTTTTGG<br>() CCTTATATAG           |
| 5.Extracellular Matrix | Ai447669 | ITGA8                                                                        | 0.47 | NM_001001309 | >Itga8_3 () TCATAAATGG                               |
| 5.Extracellular Matrix | Plekhh1  | Pleckstrin Homology domain containing, family h (with myth4 domain) member 1 | 0.38 | XM_126961    | >Plekhh1_1 () GCATAAATGG<br>>Plekhh1_6 () CCAAAGTTGG |
| 6.Stress Response      | Hspa1b   | heat shock protein 1a/b                                                      | 4.13 | NM_010478    | >Hspa1b_4 () CCATTGATGG<br>>Hspa1b_5 () CCAAATATGG   |
| 6.Stress Response      | Hspa1a   | heat shock protein 1a/b                                                      | 3.66 | NM_010479    | >Hspa1a_5 () CCTTACATGT                              |
| 6.Stress Response      | Srxn1    | sulfiredoxin 1 homolog (S. cerevisiae) [Mus musculus]                        | 3.09 | NM_029688.   | >Srxn1_6 () CCTACTTTGG                               |
| 6.Stress Response      | Znrf4    | zinc and ring finger 4                                                       | 2.09 | NM_011483    | >Znrf4_2 (-6728) CCATTTATGT                          |
| 6.Stress Response      | Defcr5   | defensin related cryptdin 5                                                  | 0.49 | NM_007851    | >Defcr5_6 (-820) CCATATAATG                          |

|                      |                |                                                                                 |             |           |                                                          |
|----------------------|----------------|---------------------------------------------------------------------------------|-------------|-----------|----------------------------------------------------------|
| 6.Stress Response    | <b>Diablo</b>  | <b>diablo homolog (drosophila)</b>                                              | <b>0.32</b> | NM_023232 | >Diablo_6 (-1108) CCATTGATGG                             |
| 6.Stress Response    | <b>Dcc</b>     | <b>deleted in colorectal carcinoma</b>                                          | <b>0.32</b> | NM_007831 | >Dcc_3 (-6314) GCAAATTTGG                                |
| 6.Stress Response    | <b>Tnfaip3</b> | <b>tumor necrosis factor, alpha-induced protein 3</b>                           | <b>0.27</b> | NM_009397 | >Tnfaip3_4 ( ) CCCTGTAAGG                                |
| 6.Stress Response    | <b>Hpx</b>     | <b>Hemopexin</b>                                                                | <b>0.24</b> | NM_017371 | >Hpx_6 ( ) CCTAAGAAGG<br>( ) CCAGAAAAGG                  |
| 6.Stress Response    | <b>Dclre1a</b> | <b>dna cross-link repair 1a, pso2 homolog</b>                                   | <b>0.49</b> | NM_018831 | >Dclre1a_6 (-1433) CCAAAGAAGG                            |
| 6.Stress Response    | <b>Ppil2</b>   | <b>peptidylprolyl isomerase (cyclophilin)-like 2</b>                            | <b>0.28</b> | NM_144954 | >Ppil2_6 ( ) CCACAGAAGG                                  |
| 6.Stress Response    | <b>Ubd</b>     | <b>ubiquitin d</b>                                                              | <b>0.27</b> | NM_023137 | >Ubd_3 (-5677) CCTGATATGG<br>>Ubd_4 (-3515) CCAAATTTGA   |
| 7.Signaling Proteins | <b>Gdf15</b>   | <b>Growth Differentiation Factor 15</b>                                         | <b>14</b>   | NM_011819 | (-4067) CCAGAAAAGG EFN2-like<br>(G4)                     |
| 7.Signaling Proteins | <b>Avpi1</b>   | <b>Arginine Vasopressin-induced 1</b>                                           | <b>6.11</b> | NM_027106 | >Avpi1_5 (-2979) CCAAACCTTGG<br>(-2354) CCATTTCTGG       |
| 7.Signaling Proteins | <b>Iqgap1</b>  | <b>IQ motif containing Gtpase Activating Protein 1</b>                          | <b>5.1</b>  | NM_016721 | >Iqgap1_5 ( ) CCATTTATAG                                 |
| 7.Signaling Proteins | <b>Arhgdig</b> | <b>rho gdp dissociation inhibitor (gdi) gamma</b>                               | <b>4.78</b> | NM_008113 | >Arhgdig_6 (-950) CCAGATATGG                             |
| 7.Signaling Proteins | <b>Gipc1</b>   | <b>gipc pdz domain containing family, member 1</b>                              | <b>4.72</b> | NM_018771 | >Gipc1_2 ( ) CCCAATAAGG<br>>Gipc1_6 ( ) TCATAAAAGG       |
| 7.Signaling Proteins | <b>Nppa</b>    | <b>Natriuretic Peptide Precursor type A</b>                                     | <b>4.48</b> | NM_008725 | >Nppa_4 (-3768) CAATAAAAGG<br>>Nppa_6 (-430) CCTTATTGG   |
| 7.Signaling Proteins | <b>Emr1</b>    | <b>egf-like module containing, mucin-like, hormone receptor-like sequence 1</b> | <b>3.77</b> | NM_010130 | >Emr1_3 (-7176) CCTAATTAGG<br>>Emr1_5 (-2968) CCAGATAAGG |
| 7.Signaling Proteins | <b>Bmp10</b>   | <b>bone morphogenetic protein 10</b>                                            | <b>3.63</b> | NM_009756 | >Bmp10_2 (-7258) CCAGAAATGG                              |
| 7.Signaling Proteins | <b>Dlg7</b>    | <b>discs, large homolog 7</b>                                                   | <b>3.2</b>  | NM_144553 | >Dlg7_4 ( ) CCTTTTATAG<br>>Dlg7_6 ( ) CCATAAAAAG         |
| 7.Signaling Proteins | <b>Tgfb3</b>   | <b>transforming growth factor, beta 3</b>                                       | <b>3.17</b> | NM_009368 | >Tgfb3_5 ( ) CCACATATGG                                  |
| 7.Signaling Proteins | <b>Bdkrb1</b>  | <b>bradykinin receptor, beta 1</b>                                              | <b>2.87</b> | NM_007539 | >Bdkrb1_3 ( ) CCATAAATCG                                 |

|                      |                |                                                                                                     |             |           |                                                          |
|----------------------|----------------|-----------------------------------------------------------------------------------------------------|-------------|-----------|----------------------------------------------------------|
| 7.Signaling Proteins | <b>Il4</b>     | <b>Interleukin 4</b>                                                                                | <b>2.47</b> | NM_021283 | >Il4_4 ( ) CCATTTATGG<br>( ) CCTTAAATGG                  |
| 7.Signaling Proteins | <b>Rho</b>     | <b>Rhodopsin</b>                                                                                    | <b>2.35</b> | NM_145383 | >Rho_3 ( ) CTATTTATGG<br>>Rho_4 ( ) CCAAAGTTGG           |
| 7.Signaling Proteins | <b>Il3ra</b>   | <b>interleukin 3 receptor, alpha chain</b>                                                          | <b>2.21</b> | NM_008369 | >Il3ra_3 ( ) CCTTTTATTG<br>>Il3ra_5 ( ) CCTGAAATGG       |
| 7.Signaling Proteins | <b>Emp1</b>    | <b>epithelial membrane protein 1</b>                                                                | <b>2.04</b> | AC122820  | ( ) CCATTTAAGG<br>>Emp1_3 ( ) CATTTTATGG                 |
| 7.Signaling Proteins | <b>Inhbc</b>   | <b>Inhibin beta-c</b>                                                                               | <b>0.49</b> | NM_010565 | (-7765) CCAGATAAGG<br>(-7743) CCAGATAAGG                 |
| 7.Signaling Proteins | <b>Apc2</b>    | <b>adenomatosis polyposis coli 2</b>                                                                | <b>0.47</b> | NM_011789 | >Apc2_5 (-1616) CCGAATTTGG                               |
| 7.Signaling Proteins | <b>Plekha1</b> | <b>pleckstrin homology domain containing, family a (phosphoinositide binding specific) member 1</b> | <b>0.46</b> | NM_133942 |                                                          |
| 7.Signaling Proteins | <b>Csh1</b>    | <b>Chorionic Somatomammotropin Hormone 1</b>                                                        | <b>0.42</b> | NM_008864 | >Csh1_6 (-1591) CCTTATATTG<br>(-543) CCTTATAAGA          |
| 7.Signaling Proteins | <b>Hcrt</b>    | <b>Hypocretin</b>                                                                                   | <b>0.38</b> | NM_010410 | >Hcrt_1 (-9573) CCATATATGA                               |
| 7.Signaling Proteins | <b>Il10ra</b>  | <b>interleukin 10 receptor, alpha</b>                                                               | <b>0.37</b> | NM_008348 | >Il10ra_2 ( ) CCAAATTTTG<br>>Il10ra_4 ( ) CCAATGAAGG     |
| 7.Signaling Proteins | <b>Arhgap9</b> | <b>rho gtpase activating protein 9</b>                                                              | <b>0.35</b> | NM_146011 |                                                          |
| 7.Signaling Proteins | <b>Efnb3</b>   | <b>Ephrin b3</b>                                                                                    | <b>0.31</b> | NM_007911 | >Efnb3_5 ( ) CCACATTTGG<br>>Efnb3_6 ( ) CCCAAGAAGG       |
| 7.Signaling Proteins | <b>Crk</b>     | <b>v-crk sarcoma virus ct10 oncogene homolog (avian)</b>                                            | <b>0.3</b>  | NM_133656 | >Crk_2 (-8434) CCATAAAAGG<br>>Crk_3 (-6102) CCTTTTAGGG   |
| 7.Signaling Proteins | <b>Lifr</b>    | <b>leukemia inhibitory factor receptor</b>                                                          | <b>0.27</b> | NM_013584 | >Lifr_2 (-7679) GCAAATTTGG<br>>Lifr_5 (-3271) CCAGAAATGG |
| 7.Signaling Proteins | <b>Olf18</b>   | <b>Olfactory Receptor 18</b>                                                                        | <b>0.17</b> | NM_146563 | >Olf18_4 ( ) CCTTTTATAG<br>>Olf18_6 ( ) CCCTATAAGG       |
| 7.Signaling Proteins | <b>Bub1</b>    | <b>budding uninhibited by benzimidazoles 1 homolog (s. cerevisiae)</b>                              | <b>0.17</b> | NM_009772 | >Bub1_4 ( ) CAATAAATGG                                   |
| 7.Signaling Proteins | <b>Scg2</b>    | <b>secretogranin ii</b>                                                                             | <b>0.14</b> | NM_009129 | (-3361) CCAAGTAAGG<br>>Scg2_5 (-1757) CCATTGATGG         |



|                      |                 |                                                             |      |            |                                                                                                                            |
|----------------------|-----------------|-------------------------------------------------------------|------|------------|----------------------------------------------------------------------------------------------------------------------------|
| 7.Signaling Proteins | Camk2a          | Calcium/Calmodulin-dependent protein Kinase ii alpha        | 0.1  | NM_009792  | >Camk2a_4 (-4502) CCACAAATGG<br>>Camk2a_5 (-1925) ACTTACATGG                                                               |
| 7.Signaling Proteins | Prlpf           | Prolactin-like Protein f                                    | 0.1  | NM_011168  | >Prlpf_5 ( ) TCATATATGG<br>>Prlpf_6 ( ) CAATATATGG                                                                         |
| 7.Signaling Proteins | Homer1          | homer homolog 1 (drosophila)                                | 0.09 | NM_011982  | >Homer1_6 (-1306) CTATTTAAAG<br>(-140) CCCAAAAAGG                                                                          |
| 7.Signaling Proteins | S100a9          | s100 calcium binding protein a9                             | 0.47 | NM_009114  | >S100a9_1 ( ) CCATAAAAAG<br>>S100a9_4 ( ) CCATGAAAGG                                                                       |
| 7.Signaling Proteins | Jag2            | Jag2 jagged 2                                               | 0.45 | NM_010588. |                                                                                                                            |
| 8.Inhibitors         | Usp29           | UbiquitinSpecific Peptidase 29                              | 3.72 | NM_021323  | ( ) CCATATATTG<br>( ) TCTTATATGG                                                                                           |
| 8.Inhibitors         | Serpine1        | Serine (or cysteine) Peptidase inhibitor, clade e, member 1 | 2.94 | NM_008871  | >Serpine1_3 (-5202) CCATTTATGG<br>(-5069) CCATTTATAG                                                                       |
| 8.Inhibitors         | Dpp7            | Dipeptidylpeptidase 7                                       | 2.8  | NM_031843  | >Dpp7_4 ( ) CAATTTATGG                                                                                                     |
| 8.Inhibitors         | Spink3          | Serine Peptidase inhibitor, kazal type 3                    | 0.4  | NM_009258  | (-5153) CCATAAAAAGG<br>>Spink3_4 (-4697) CCTTGTATGG                                                                        |
| 8.Inhibitors         | Pcsk5           | Proprotein Convertase Subtilisin / Kexin type 5             | 0.37 | XM_129214  | >Pcsk5_4 ( ) CTATAAAAAGG<br>>Pcsk5_5 ( ) CCATAAAAAGG                                                                       |
| 8.Inhibitors         | Capn2           | Calpain 2                                                   | 0.3  | NM_009794  | >Capn2_6 ( ) ACAAATTTGG                                                                                                    |
| 8.Inhibitors         | Tesp2           | Testicular Serine Protease 2                                | 0.16 | NM_009356  | >Tesp2_4 (-4474) CCTTTTATAG                                                                                                |
| 8.Inhibitors         | Mug1/2          | Murinoglobulin 1 & 2                                        | 0.14 | NM_008645  | >Mug1_2 (-8065) CATAAATGG<br>>Mug1_4 (-3915) CCATGTCAGG                                                                    |
| 8.Inhibitors         | Pzp             | Pregnancy Zone Protein                                      | 0.12 | NM_007376  | >Pzp_4 ( ) CCAGAAATGG<br>>Pzp_6 ( ) CCAGATAAGG                                                                             |
| 8.Inhibitors         | Cpa3            | carboxypeptidase a3, mast cell                              | 0.1  | NM_007753  | >Cpa3_1 (-9121) CCCAATTTGG                                                                                                 |
| 8.Inhibitors         | Serpina1a/b/c/d | Serine (or cysteine) Peptidase Inhibitor, clade a, member 1 | 0.06 | NM_009243  | >Serpina1a_1 (-9247) CCTTGTITGG<br>>Serpina1a_3 (-5653) CATTATATGG<br>>Serpina1a_5 (-3149) CCAATAAGG<br>(-1730) CATTATATGG |
| 9.Complement         | C8g             | complement component 8, gamma polypeptide                   | 0.46 | NM_027062  | ( ) cccaatagg<br>>C8g_6 ( ) CCAGATAAGG                                                                                     |
| 9.Complement         | F10             | Coagulation Factor X                                        | 0.31 | NM_007972  | >F10_4 (-3411) CCATAAAAAGT                                                                                                 |



|                    |         |                                                                            |      |              |                                                                 |
|--------------------|---------|----------------------------------------------------------------------------|------|--------------|-----------------------------------------------------------------|
| 9.Complement       | Plg     | Plasminogen                                                                | 0.13 | NM_008877    |                                                                 |
| 9.Complement       | Cfi     | Complement Component Factor i                                              | 0.1  | NM_007686    | >Cfi_1 ( ) TCTAATTAGG                                           |
| 9.Complement       | Fgb     | Fibrinogen, B beta polypeptide                                             | 0.04 | NM_181849    | >Fgb_6 ( ) CCATATAAAG                                           |
| 9.Complement       | Kng1    | Kininogen 1                                                                | 0.03 | NM_001102411 | >Kng1_3 (-5823) CCTTTTCTGG<br>>Kng1_5 (-2400) TCTTCTTTGG        |
| 9.Complement       | C8g     | C8g complement component 8, gamma subunit                                  | 0.46 | NM_027062    | >C8g_5 ( ) actaatagg<br>( ) cccaatatgg<br>>C8g_6 ( ) CCAGATAAGG |
| 10.Ion Transport   | Slc20a1 | Solute Carrier family 20, member 1                                         | 2.02 | NM_015747    | >Slc20a1_2 ( ) CCAGAAAAGG<br>>Slc20a1_5 ( ) CCAAATAAGG          |
| 10.Ion Transport   | HNEDC2  | HNEDC2                                                                     | 2.88 | NM_178877    | >Nhedc2_1 ( ) CCAAAGAAGG                                        |
| 10.Ion Transport   | Aqp4    | Aquaporin 4 (Mercurial-insensitive water channel)                          | 0.21 | NM_009700    | >Aqp4_4 ( ) CCATATTTGG<br>>Aqp4_5 ( ) ACTTATATGG                |
| 10.Ion Transport   | Slc4a8  | Solute Carrier family 4 (anion exchanger), member 8                        | 0.39 | NM_021530    | >Slc4a8_5 (-1933) CCTTTTATAG<br>(-1803) CCTGTAATGG              |
| 10.Ion Transport   | Gabra6  | Gamma-Aminobutyric Acid (gaba-a) Receptor, subunit alpha 6                 | 0.36 | NM_008068    | >Gabra6_4 ( ) CCTTTTATGT<br>>Gabra6_6 ( ) TCATTTATGG            |
| 10.Ion Transport   | Atp1a1  | ATPase, Na <sup>+</sup> /K <sup>+</sup> transporting, alpha 1 polypeptide  | 0.32 | NM_144900    | >Atp1a1_4 ( ) CCAGATATGG<br>>Atp1a1_6 ( ) CCATAAAAAG            |
| 10.Ion Transport   | Trpm7   | Transient Receptor Potential cation channel, subfamily m, member 7         | 0.32 | NM_021450    | >Trpm7_2 ( ) CCATATAATG<br>>Trpm7_6 ( ) CCAAAGAAGG              |
| 10.Ion Transport   | Kcnq2   | Potassium Voltage-gated Channel, subfamily q, member 2                     | 0.32 | NM_001006669 | >Kcnq2_5 ( ) CCATATATGT                                         |
| 10.Ion Transport   | Gria2   | Glutamate Receptor, Ionotropic, Ampa2 (alpha 2)                            | 0.24 | NM_001039195 | >Gria2_6 ( ) CCTTTTATAG                                         |
| 10.Ion Transport   | Gabrb2  | Gamma-Aminobutyric Acid (gaba-a) Receptor, subunit beta 2                  | 0.15 | NM_008070    | >Gabrb2_5 (-2826) CCTATTAGGG<br>(-2713) CCATGAATGG              |
| 10.Ion Transport   | Slc10a1 | Solute Carrier family 10 (sodium/bile acid cotransporter family), member 1 | 0.12 | NM_011387    | >Slc10a1_5 ( ) CCATAAAATG                                       |
| 11.Immune Response | Ccl8    | chemokine (c-c motif) ligand 8                                             | 4.81 | NM_021443    | >Ccl8_3 ( ) CCTTATATAG<br>>Ccl8_6 ( ) CTATAAAAGG                |
| 11.Immune Response | Cxcl12  | Chemokine (c-x-c motif) ligand 12                                          | 3.7  | NM_001012477 | >Cxcl12_1 (-9617) CCATAAAAGA<br>>Cxcl12_4 (-4682) CCATATATGT    |

|                    |               |                                            |      |              |                                                                      |
|--------------------|---------------|--------------------------------------------|------|--------------|----------------------------------------------------------------------|
| 11.Immune Response | H2-TL-T17-c   | histocompatibility 2, t region locus 10    | 2.84 | M35247       |                                                                      |
| 11.Immune Response | H2-DMb1       | histocompatibility 2, class ii, locus mb1  | 2.11 | NM_010387    | >H2-DMb1_2 (-7982) CCAGATTGG<br>>H2-DMb1_4 (-4267) CCATGTAAG         |
| 11.Immune Response | Igh-V         | immunoglobulin heavy chain variable region | 0.49 | L33937       |                                                                      |
| 11.Immune Response | Il1f5         | interleukin 1 family, member 5 (delta)     | 0.41 | NM_019451    | ( ) CCTAATTAGA<br>>Il1f5_4 ( ) CCATATTAGG                            |
| 11.Immune Response | Igh-VX24      | immunoglobulin heavy chain (x24 family)    | 0.38 | X55984       |                                                                      |
| 11.Immune Response | Orm1          | Orosomucoid 1                              | 0.32 | NM_008768    | >Orm1_4 (-4642) CCATATAATG<br>>Orm1_5 ( ) CCATGAAAGG                 |
| 11.Immune Response | H2-M10.1      | histocompatibility 2, m region locus 10.1  | 0.28 | NM_013544    | >H2-M10.1_3 ( ) CAATAAATGG                                           |
| 11.Immune Response | Il15          | Interleukin 15,                            | 0.25 | NM_008357    | >Il15_2 (-7266) CCTTCTTTGT                                           |
| 11.Immune Response | Cr1           | ig kappa chain                             | 0.13 | U60442       |                                                                      |
| 12.Other Proteins  | 2610201A13Rik | riken cdna 2610201a13 gene                 | 6.81 | AA222883     | >2610201A13Rik_4 ( ) CCAAAGATGG                                      |
| 12.Other Proteins  | AV169168      |                                            | 5.47 | AV169168     |                                                                      |
| 12.Other Proteins  | Aqr           | Aquarius                                   | 4.53 | NM_009702    | >Aqr_6 (-1547) CCATAAAAGA<br>(-792) CCAAAAAGA                        |
| 12.Other Proteins  | AA408556      | expressed sequence aa408556                | 3.71 | NM_199447    | >AA408556_Rrp12_1 ( ) CTATAAAAGG<br>>AA408556_Rrp12_4 ( ) ACATATATGG |
| 12.Other Proteins  | Dnase1l2      | Deoxyribonuclease 1-like 2                 | 3.55 | NM_025718    | >Dnase1l2_1 ( ) CCTTCTTTTG<br>>Dnase1l2_6 ( ) CCAAATCTGG             |
| 12.Other Proteins  | Ndr4          | n-myc downstream regulated gene 4          | 3.34 | NM_145602    | >Ndr4_2 ( ) CCATAAAGGG<br>>Ndr4_5 ( ) CCTTAAATAG                     |
| 12.Other Proteins  | A430107D22Rik | riken cdna a430107d22 gene                 | 3.17 | NM_178785    | >A430107D22Rik_2 ( ) CCTTTTCTGG<br>>A430107D22Rik_3 ( ) CCTTCTTTTG   |
| 12.Other Proteins  | BB001228      | expressed sequence bb001228                | 3.15 | BB001228     | >BB001228_5 ( ) CCATTTTTGG                                           |
| 12.Other Proteins  | 1700020M16Rik | r3h domain and coiled-coil containing 1    | 2.77 | XM_001479474 | ( ) CCATTTTTGG<br>>R3hcc1_2 ( ) CCATATAAGA                           |
| 12.Other Proteins  | Rap2ip        | rap2 interacting protein                   | 2.5  | NM_016759    | >Rap2ip_3 (-6720) GCTTCTTTGG                                         |

|                   |               |                                                            |      |               |                                                            |
|-------------------|---------------|------------------------------------------------------------|------|---------------|------------------------------------------------------------|
| 12.Other Proteins | Wbp5          | ww domain binding protein 5                                | 2.37 | NM_011712     | >Wbp5_2 (-6714) CCAAATTTTG<br>>Wbp5_3 (-6714) CCAAATTTTG   |
| 12.Other Proteins | lft81         | Intraflagellar transport 81 homolog (chlamydomonas)        | 0.49 | NM_009879     | >lft81_5 ( ) CTATATAAGG<br>>lft81_6 ( ) CCAAGTTTGG         |
| 12.Other Proteins | Stard10       | Start Domain containing 10                                 | 0.47 | NM_019990     | >Stard10_2 ( ) CATTTATGG<br>>Stard10_6 ( ) CCAAATAGGG      |
| 12.Other Proteins | Ofa           | Oncofetal Antigen                                          | 0.46 | NM_011627     | >Ofa_6 ( ) CCTTTTAAGG                                      |
| 12.Other Proteins | Cdca5         | cell division cycle associated 5                           | 0.44 | NM_026410     | >Cdca5_6 ( ) CCATTTATTG<br>( ) CCATTTATTG                  |
| 12.Other Proteins | Gm1419        | gene model 1419, (ncbi)                                    | 0.44 | NG_005612     | >Gm1419_1 ( ) CAAAATTTGG                                   |
| 12.Other Proteins | Lgals2        | riken cdna 2200008f12 gene                                 | 0.44 | NM_025622     | >Lgals2_5 (-2024) CCATAAAATG                               |
| 12.Other Proteins | Tyms-ps       | thymidylate synthase, pseudogene                           | 0.43 | NR_000040     | >Tyms-ps_1 ( ) ACAAATTTGG<br>>Tyms-ps_2 ( ) GCTTTTATGG     |
| 12.Other Proteins | D8Erttd738e   | dna segment, chr 8, erato doi 738, expressed               | 0.41 | NM_001007571  | No SRE's                                                   |
| 12.Other Proteins | Hba-x         | hemoglobin x, alpha-like embryonic chain in hba complex    | 0.41 | NM_010405     | >Hba-x_4 (-3571) CCAAGTTTGG<br>>Hba-x_6 (-1168) CCTTTTATAG |
| 12.Other Proteins | Ubtg protein  | Loc380988                                                  | 0.4  | XM_001475007. | >AA672647_3 ( ) CCTTTTCTGG                                 |
| 12.Other Proteins | C77681        | expressed sequence c77681                                  | 0.38 | C77681        | >C77681_2 ( ) CCTAATATGG                                   |
| 12.Other Proteins | C77691        | expressed sequence c77691                                  | 0.31 | C77691        | >C77691_6 ( ) CCATAAATGT                                   |
| 12.Other Proteins | 8430410A17Rik | riken cdna 8430410a17 gene                                 | 0.3  | NM_173737     | >8430410A17Rik_3 ( ) CCAATTTTGG                            |
| 12.Other Proteins | Gm 1418       | gene model 1418, (ncbi)                                    | 0.29 | NG_005612     | >Gm1418_3 ( ) CCTTTTATGA                                   |
| 12.Other Proteins | Lanc12        | lanc (bacterial lantibiotic synthetase component c)-like 2 | 0.28 | NM_133737     | >Lanc12_6 (-977) CCAATGTAGG<br>(-458) CCAATGAAGG           |
| 12.Other Proteins | Dmrtb1        | dmrt-like family b with proline-rich c-terminal, 1         | 0.27 | XM_205469     | >Dmrtb1_6 ( ) ACTTATATGG                                   |
| 12.Other Proteins | Cwf1911       | cwf19-like 1, cell cycle control (s. pombe)                | 0.26 | NM_001081077  | >Cwf1911_3 ( ) CCATATTTGG                                  |
| 12.Other Proteins | LOC547428     | similar to trav19                                          | 0.26 | X72904.       | >LOC547428_4 ( ) CCATGAAAGG<br>( ) CCATTTAAGG              |

|                   |               |                            |      |              |                                                          |
|-------------------|---------------|----------------------------|------|--------------|----------------------------------------------------------|
| 12.Other Proteins | Gm1060        | gene model 1060, (ncbi)    | 0.18 | NM_001033460 |                                                          |
| 12.Other Proteins | 1100001G20Rik | riken cdna 1100001g20 gene | 0.12 | NM_183249    | >1100001G20Rik_4 (-4459) CCATGTAGGG                      |
| 12.Other Proteins | 0610005C13Rik | riken cdna 0610005c13 gene | 0.1  | AI042964.    | >0610005C13Rik_1 ( ) CCAAAGATGG                          |
| 12.Other Proteins | 1500003O03Rik | riken cdna 1500003o03 gene | 0.09 | NM_019769    |                                                          |
| 12.Other Proteins | Mup1          | major urinary protein 1    | 0.03 | NM_031188    | >Mup1_2 (-8164) CCAAATTGG<br>>Mup1_6 (-1109) CCATATAAAG  |
| 12.Other Proteins | Mup5          | Major Urinary Protein 5    | 0.03 | NM_008649    | >Mup5_5 ( ) CCCAATTTGG<br>>Mup5_6 ( ) CCATATAAAG         |
| 12.Other Proteins | Mup2          | Major Urinary Protein 2    | 0.02 | NM_001045550 | >Mup2_3 (-6382) CCATAGATGG<br>>Mup2_6 (-954) CCATATAAAG  |
| 12.Other Proteins | Mup3          | Major Urinary Protein 3    | 0.01 | NM_001039544 | >Mup3_1 (-8543) CCATAGAAGG<br>>Mup3_4 (-4250) CCATAGATGG |
